# Supplementary material for: Genome-wide prioritization of disease genes and identification of disease-disease associations from an integrated human functional linkage network
Source: PubMed Central journal article supplement (PMC2768980; doi:10.1186/gb-2009-10-9-r91), 2009-09-03
Supplement: gb-2009-10-9-r91-S7.pdf [file gb-2009-10-9-r91-S7.pdf]

**List of the 22 predicted obesity genes among the top 100 predicted gene list that overlap with the obesity genes collected from literature by Hancock *et al* [17].**

Among the top 100 predicted obesity genes based on the functional linkage network (text mining data is excluded), 22 genes overlap with the obesity genes collected by Hancock *et al.* from literature [17]. These genes and the evidence supporting their association with obesity are listed below. The supporting evidences are based on table S3 of Hancock *et al.*'s paper [17].

| Gene Symbol | Entrez Gene ID | Rank | Supporting evidence for association with obesity |
|-------------|----------------|------|--------------------------------------------------|
| EP3         | 5733           | 2    | [2]                                              |
| INSR        | 3643           | 3    | [1] [5]                                          |
| HTR2A       | 3356           | 11   | [3] [8]                                          |
| ALPHA1BAR   | 147            | 15   | [1]                                              |
| PYY         | 5697           | 18   | [6]                                              |
| PYY4        | 4852           | 20   | [1] [3] [8]                                      |
| RDC8        | 135            | 21   | [2]                                              |
| RXRB        | 6257           | 25   | [2]                                              |
| LOC654136   | 1131           | 31   | [1][8]                                           |
| NR3A1       | 2099           | 33   | [2] [3] [12]                                     |
| DRD4        | 1815           | 44   | [3] [8]                                          |
| MGC104991   | 3570           | 53   | [3] [8]                                          |
| CCKRA       | 886            | 55   | [3] [8] [12]                                     |
| HTR2C       | 3358           | 58   | [1] [3] [8]                                      |
| PPARGC1A    | 10891          | 64   | [3] [16]                                         |
| HRH1        | 3269           | 66   | [1]                                              |
| RHR         | 153            | 70   | [1] [2] [3]                                      |
| NPY1R       | 4886           | 75   | [1] [6]                                          |
| SLC1        | 2847           | 83   | [1]                                              |
| PPY         | 5539           | 84   | [1]                                              |
| RXRA        | 6256           | 89   | [2]                                              |
| HCRTR2      | 3062           | 94   | [8]                                              |

**REFERENCES:**

1. Perusse, L., et al., *The human obesity gene map: the 2004 update*. *Obes Res*, 2005. 13(3): p. 381-490.

2. Ailhaud, G. and H. Hauner, *Development of White Adipose Tissue*, in *Handbook of Obesity: etiology and pathophysiology*, G.A. Bray and C. Bouchard, Editors. 2004, Marcel Dekker, Inc.: New York. p. 481-514.
3. Bouchard, C., et al., *Obesity Gene Map Database*. 2006.
4. Shklyaev, S., et al., *Sustained peripheral expression of transgene adiponectin offsets the development of diet-induced obesity in rats*. Proc Natl Acad Sci U S A, 2003. 100(24): p. 14217-22.
5. Fajas, L. and J. Auwerx, *Peroxisome proliferator-activated receptor gamma and the transcriptional control of adipogenesis and metabolism*, in *Handbook of Obesity: etiology and pathophysiology*, G.A. Bray and C. Bouchard, Editors. 2004, Marcel Dekker, Inc.: New York. p. 559-587.
6. Langin, D. and M. Lafontan, *Lipolysis and lipid mobilization in human adipose tissue*, in *Handbook of Obesity: etiology and pathophysiology*, G.A. Bray and C. Bouchard, Editors. 2004, Marcel Dekker, Inc.: New York. p. 515-532.
7. Kurokawa, N., et al., *Association of BMI with the beta3-adrenergic receptor gene polymorphism in Japanese: meta-analysis*. Obes Res, 2001. 9(12): p. 741-5.
8. Leibowitz, S.F. and B.G. Hoebel, *Behavioral Neuroscience and Obesity*, in *Handbook of Obesity: etiology and pathophysiology*, G.A. Bray and C. Bouchard, Editors. 2004, Marcel Dekker, Inc.: New York. p. 301-371.
9. Collin, G.B., et al., *Alms1-disrupted mice recapitulate human Alstrom syndrome*. Hum Mol Genet, 2005. 14(16): p. 2323-33.
10. Hara-Chikuma, M., et al., *Progressive adipocyte hypertrophy in aquaporin-7-deficient mice: adipocyte glycerol permeability as a novel regulator of fat accumulation*. J Biol Chem, 2005. 280(16): p. 15493-6.
11. Hibuse, T., et al., *Aquaporin 7 deficiency is associated with development of obesity through activation of adipose glycerol kinase*. Proc Natl Acad Sci U S A, 2005. 102(31): p. 10993-8.
12. Allison, D.B., et al., *Genetic Influences on Obesity*, in *Obesity: Mechanisms and Clinical Management*, R. Eckel, Editor. 2003, Elsevier: New York. p. 31-74.
13. He, L., et al., *A biochemical function for attractin in agouti-induced pigmentation and obesity*. Nat Genet, 2001. 27(1): p. 40-7.
14. Turek, F.W., et al., *Obesity and metabolic syndrome in circadian Clock mutant mice*. Science, 2005. 308(5724): p. 1043-5.
15. Gloaguen, I., et al., *Ciliary neurotrophic factor corrects obesity and diabetes associated with leptin deficiency and resistance*. Proc Natl Acad Sci U S A, 1997. 94(12): p. 6456-61.
16. Lowell, B.B. and B.M. Spiegelman, *Towards a molecular understanding of adaptive thermogenesis*. Nature, 2000. 404(6778): p. 652-60.
17. Hancock, A., et al, *Adaptations to Climate in Candidate Genes for Common Metabolic Disorders*. Plos Genetics, 2008 4(2): p. 1-13.
