# Supplementary material for: Genome-wide prioritization of disease genes and identification of disease-disease associations from an integrated human functional linkage network
Source: PubMed Central journal article supplement (PMC2768980; doi:10.1186/gb-2009-10-9-r91), 2009-09-03
Supplement: gb-2009-10-9-r91-S9.pdf [file gb-2009-10-9-r91-S9.pdf]

**Top 100 disease pairs with the highest mutual predictability scores and the supporting evidence for the association. The disease pairs are listed in descending order based on the mutual predictability scores. The red rows are disease pairs without sharing disease genes.**

| Disease ID |      | Disease name                         |                                               | Mutual predictability | Supporting evidence for association                                                                                                   |
|------------|------|--------------------------------------|-----------------------------------------------|-----------------------|---------------------------------------------------------------------------------------------------------------------------------------|
| A          | B    | A                                    | B                                             |                       |                                                                                                                                       |
| 1615       | 1307 | Zellweger syndrome                   | Refsum disease                                | 0.9998                | Both are peroxisome biogenesis disorders [1]                                                                                          |
| 1615       | 56   | Zellweger syndrome                   | Adrenoleukodystrophy                          | 0.9997                | Both are peroxisome biogenesis disorders [1]                                                                                          |
| 56         | 1307 | Adrenoleukodystrophy                 | Refsum disease                                | 0.9989                | Both are in neurological class based on Goh <i>et al.</i> 's disease classification [2]. Both are peroxisome biogenesis disorders [1] |
| 287        | 681  | Central hypoventilation syndrome     | Hirschsprung disease                          | 0.9974                | Both are caused by deficiency in development [3].                                                                                     |
| 877        | 6350 | Leigh syndrome                       | Combined oxidative phosphorylation deficiency | 0.9726                | Both are involved in deficiency occurring in mitochondria (OMIM record: 256000, 609060, 610498, 610678, 611719, 610505 )              |
| 877        | 5016 | Leigh syndrome                       | Mitochondrial DNA depletion syndrome          | 0.9640                | Both are involved in deficiency occurring in mitochondria (OMIM record: 256000, 251880, 609560)                                       |
| 1281       | 187  | Pseudohypoaldosteronism              | Bartter syndrome                              | 0.9613                | Both are involved in ion-transport deficiency [4-6].                                                                                  |
| 877        | 1016 | Leigh syndrome                       | Mitochondrial complex I/II/III deficiency     | 0.9526                | Both are involved in deficiency occurring in mitochondria (OMIM record: 256000, 252010, 124000, 252011)                               |
| 689        | 1574 | Holoprosencephaly                    | Waardenburg syndrome                          | 0.9511                | Both are caused by deficiency in development [3] (OMIM record: 236100 ).                                                              |
| 681        | 1574 | Hirschsprung disease                 | Waardenburg syndrome                          | 0.9468                | Both are caused by deficiency in development [3]                                                                                      |
| 5016       | 6350 | Mitochondrial DNA depletion syndrome | Combined oxidative phosphorylation deficiency | 0.9410                | Both are involved in deficiency occurring in mitochondria (OMIM record: 609060, 610498, 610678, 611719, 610505, 251880, 609560).      |
| 1316       | 352  | Retinitis pigmentosa                 | Cone or cone-rod dystrophy                    | 0.9405                | Both are in ophthalmological class based on Goh <i>et al.</i> 's disease classification [2].                                          |

|      |      |                                           |                                               |        |                                                                                                                                          |
|------|------|-------------------------------------------|-----------------------------------------------|--------|------------------------------------------------------------------------------------------------------------------------------------------|
| 1178 | 1170 | Pancreatic cancer or carcinoma            | Ovarian cancer or carcinoma                   | 0.9402 | Both are in cancer class based on Goh <i>et al.</i> 's disease classification [2]                                                        |
| 352  | 1110 | Cone or cone-rod dystrophy                | Night blindness                               | 0.9400 | Both are in ophthalmological class based on Goh <i>et al.</i> 's disease classification [2].                                             |
| 287  | 1574 | Central hypoventilation syndrome          | Waardenburg syndrome                          | 0.9397 | Both are caused by deficiency in development [3].                                                                                        |
| 1016 | 6350 | Mitochondrial complex I II/III deficiency | Combined oxidative phosphorylation deficiency | 0.9269 | Both are involved in deficiency occurring in mitochondria (OMIM record: 609060, 610498, 610678, 611719, 610505, 252010, 124000, 252011). |
| 1497 | 520  | Thrombophilia                             | Factor H V X XI XII XIII A XIII B deficiency  | 0.9268 | Both are in hematological class based on Goh <i>et al.</i> 's disease classification [2]                                                 |
| 228  | 523  | Breast cancer                             | Fanconi anemia                                | 0.9266 | Fanconi anemia has strong predisposition to cancer [2].                                                                                  |
| 668  | 1170 | Hepatocellular carcinoma                  | Ovarian cancer or carcinoma                   | 0.9247 | Both are in cancer class based on Goh <i>et al.</i> 's disease classification [2]                                                        |
| 873  | 352  | Leber congenital amaurosis                | Cone or cone-rod dystrophy                    | 0.9241 | Both are in ophthalmological class based on Goh <i>et al.</i> 's disease classification [2].                                             |
| 523  | 1608 | Fanconi anemia                            | Xeroderma pigmentosum                         | 0.9240 | Xeroderma pigmentosum leads to skin cancer and Fanconi anemia has strong predisposition to cancer [2, 7].                                |
| 1016 | 5016 | Mitochondrial complex I II/III deficiency | Mitochondrial DNA depletion syndrome          | 0.9232 | Both are involved in deficiency occurring in mitochondria (OMIM record: 252010, 124000, 252011, 251880, 609560).                         |
| 228  | 1178 | Breast cancer                             | Pancreatic cancer or carcinoma                | 0.9231 | Both are in cancer class based on Goh <i>et al.</i> 's disease classification [2].                                                       |
| 724  | 103  | Hypercholesterolemia                      | Amyloidosis                                   | 0.9228 | Primary amyloidosis was reported to be associated with hypercholesterolemia [8].                                                         |
| 346  | 1170 | Colon cancer                              | Ovarian cancer or carcinoma                   | 0.9210 | Both are in cancer class based on Goh <i>et al.</i> 's disease classification [2].                                                       |

|            |             |                                     |                                                 |               |                                                                                                                                                                                                             |
|------------|-------------|-------------------------------------|-------------------------------------------------|---------------|-------------------------------------------------------------------------------------------------------------------------------------------------------------------------------------------------------------|
| 427        | 1020        | Diabetes mellitus                   | Maturity onset diabetes of the young            | 0.9205        | Both are involved in diminished production of insulin or diminished response to insulin [9, 10].                                                                                                            |
| <b>240</b> | <b>1497</b> | <b>Complement system deficiency</b> | <b>Thrombophilia</b>                            | <b>0.9193</b> | <b>Complement activation is indicated to mediate the induction of thrombosis [11-13].</b>                                                                                                                   |
| 268        | 1040        | Cardiomyopathy                      | Muscular dystrophy                              | 0.9164        | Cardiomyopathy is a frequent occurrence in muscular dystrophy [14].                                                                                                                                         |
| 98         | 103         | Alzheimer disease                   | Amyloidosis                                     | 0.9161        | Both are in neurological class based on Goh <i>et al.</i> 's disease classification [2].                                                                                                                    |
| <b>240</b> | <b>520</b>  | <b>Complement system deficiency</b> | <b>Factor V X XI XII XIII XIII B deficiency</b> | <b>0.9141</b> | <b>"Factor V X XI XII XIII XIII B deficiency" involves in deficiency in coagulation factors [15]. Evidence shows that there is crosstalk between the complement system and coagulation System [15, 16].</b> |
| 268        | 1059        | Cardiomyopathy                      | Myopathy                                        | 0.91266       | Both are involved in muscle contraction deficiency (OMIM record: 115200, 500000, 192600, 601154, 600884, 600858, 161800, 605355, 608810, 160150, 601419, 606768, 255110, 160500).                           |
| 346        | 668         | Colon cancer                        | Hepatocellular carcinoma                        | 0.9124        | Both are in cancer class based on Goh <i>et al.</i> 's disease classification [2].                                                                                                                          |
| 1383       | 9038        | Severe combined immunodeficiency    | Multiple sclerosis                              | 0.9122        | Multiple sclerosis is an autoimmune disease that affects the central nervous system [17].                                                                                                                   |
| <b>689</b> | <b>224</b>  | <b>Holoprosencephaly</b>            | <b>Brachydactyly</b>                            | <b>0.9108</b> | <b>Both are involved in deficiency in development [18] (OMIM record: 236100).</b>                                                                                                                           |
| 98         | 1054        | Alzheimer disease                   | Myocardial infarction                           | 0.9094        | Vascular disorders have been indicated as risk factors for Alzheimer disease [19].                                                                                                                          |
| 523        | 1178        | Fanconi anemia                      | Pancreatic cancer or carcinoma                  | 0.9094        | Fanconi anemia has strong predisposition to cancer [2].                                                                                                                                                     |
| <b>296</b> | <b>1033</b> | <b>Ceroid-lipofuscinosis</b>        | <b>Mucopolysaccharidosis</b>                    | <b>0.9083</b> | <b>Both are involved in abnormalities of lysosomal function [20].</b>                                                                                                                                       |

|      |      |                                  |                                             |        |                                                                                                                                                                       |
|------|------|----------------------------------|---------------------------------------------|--------|-----------------------------------------------------------------------------------------------------------------------------------------------------------------------|
| 1497 | 103  | Thrombophilia                    | Amyloidosis                                 | 0.9076 | Thrombotic and hemorrhagic complications frequently have been observed in patients with amyloidosis [21].                                                             |
| 228  | 1170 | Breast cancer                    | Ovarian cancer or carcinoma                 | 0.9075 | Both are in cancer class based on Goh <i>et al.</i> 's disease classification [2]                                                                                     |
| 912  | 187  | Long QT syndrome                 | Bartter syndrome                            | 0.9055 | Both are involved in ion-transport deficiency [6, 22].                                                                                                                |
| 572  | 668  | Gastric cancer                   | Hepatocellular carcinoma                    | 0.9012 | Both are in cancer class based on Goh <i>et al.</i> 's disease classification [2].                                                                                    |
| 1316 | 873  | Retinitis pigmentosa             | Leber congenital amaurosis                  | 0.9011 | Both are in ophthalmological class based on Goh <i>et al.</i> 's disease classification [2]                                                                           |
| 1272 | 1178 | Prostate cancer                  | Pancreatic cancer or carcinoma              | 0.8976 | Both are in cancer class based on Goh <i>et al.</i> 's disease classification [2].                                                                                    |
| 240  | 496  | Complement system deficiency     | Epiphyseal dysplasia                        | 0.8958 | Not available                                                                                                                                                         |
| 912  | 166  | Long QT syndrome                 | Atrial fibrillation or Atrial septal defect | 0.8932 | Both are in cardiovascular class based on Goh <i>et al.</i> 's disease classification [2]                                                                             |
| 1324 | 9038 | Rheumatoid arthritis             | Multiple sclerosis                          | 0.8932 | Both are disorders with autoimmune features [17] (OMIM record: 180300).                                                                                               |
| 1054 | 724  | Myocardial infarction            | Hypercholesterolemia                        | 0.8919 | Hypercholesterolemic mice could develop myocardial infarction [23].                                                                                                   |
| 1170 | 978  | Ovarian cancer or carcinoma      | Melanoma                                    | 0.8894 | Both are in cancer class based on Goh <i>et al.</i> 's disease classification [2]                                                                                     |
| 228  | 1272 | Breast cancer                    | Prostate cancer                             | 0.8882 | Both are in cancer class based on Goh <i>et al.</i> 's disease classification [2]                                                                                     |
| 1471 | 1324 | Systemic lupus erythematosus     | Rheumatoid arthritis                        | 0.8819 | Rheumatoid arthritis has autoimmune features (OMIM record: 180300) and systemic lupus erythematosus is classified as immunological diseases by Goh <i>et al.</i> [2]. |
| 287  | 1218 | Central hypoventilation syndrome | Pheochromocytoma                            | 0.8811 | Both are involved in malfunction of neural crest cells [24, 25].                                                                                                      |

|      |      |                                  |                                                         |        |                                                                                                                                                                                                                                                                                |
|------|------|----------------------------------|---------------------------------------------------------|--------|--------------------------------------------------------------------------------------------------------------------------------------------------------------------------------------------------------------------------------------------------------------------------------|
| 1178 | 1608 | Pancreatic cancer or carcinoma   | Xeroderma pigmentosum                                   | 0.8809 | Xeroderma pigmentosum leads to skin cancer [7].                                                                                                                                                                                                                                |
| 493  | 496  | Epidermolysis bullosa            | Epiphyseal dysplasia                                    | 0.8804 | Not available                                                                                                                                                                                                                                                                  |
| 1249 | 5016 | Porphyria                        | Mitochondrial DNA depletion syndrome                    | 0.8798 | Porphyria is caused by the dysfunction of the heme biosynthetic pathway, some enzyme members of this pathway are located in mitochondria. Mitochondrial DNA depletion syndrome are also involved in dysfunction of enzymes in mitochondria [26] (OMIM record: 609560, 251880). |
| 1383 | 802  | Severe combined immunodeficiency | Immunodeficiency due to defect in CD3 or with hyper-IgM | 0.8763 | Both are in Immunological class based on Goh <i>et al.</i> 's disease classification [2].                                                                                                                                                                                      |
| 681  | 1218 | Hirschsprung disease             | Pheochromocytoma                                        | 0.8755 | Both are involved in malfunction of neural crest cells [24, 25].                                                                                                                                                                                                               |
| 1471 | 9038 | Systemic lupus erythematosus     | Multiple sclerosis                                      | 0.8741 | Multiple sclerosis is an autoimmune disease that affects the central nervous system [17]. Systemic lupus erythematosus is classified as a Immunological disease by Goh <i>et al.</i> [2].                                                                                      |
| 240  | 1054 | Complement system deficiency     | Myocardial infarction                                   | 0.8732 | There is a pathogenetic role for complement activation in the development of myocardial damage after infarction [27].                                                                                                                                                          |
| 940  | 9038 | Malaria                          | Multiple sclerosis                                      | 0.8730 | Multiple sclerosis is an autoimmune disease that affects the central nervous system [17]. Malaria is defined as a immunological disease by Goh <i>et al.</i> [2].                                                                                                              |
| 1040 | 1578 | Muscular dystrophy               | Walker-Warburg syndrome                                 | 0.8723 | Congenital muscular dystrophy is a feature of the Walker-Warburg syndrome [28].                                                                                                                                                                                                |
| 240  | 103  | Complement system deficiency     | Amyloidosis                                             | 0.8721 | There was evidence of complement activation in acquired and hereditary amyloid neuropathy [29].                                                                                                                                                                                |

|             |             |                                         |                                                    |               |                                                                                                                                                                                             |
|-------------|-------------|-----------------------------------------|----------------------------------------------------|---------------|---------------------------------------------------------------------------------------------------------------------------------------------------------------------------------------------|
| 1178        | 978         | Pancreatic cancer or carcinoma          | Melanoma                                           | 0.8715        | Both are in cancer class based on Goh <i>et al.</i> 's disease classification [2].                                                                                                          |
| 572         | 1170        | Gastric cancer                          | Ovarian cancer or carcinoma                        | 0.8697        | Both are in cancer class based on Goh <i>et al.</i> 's disease classification [2].                                                                                                          |
| <b>1615</b> | <b>5016</b> | <b>Zellweger syndrome</b>               | <b>Mitochondrial DNA depletion syndrome</b>        | <b>0.8688</b> | <b>Zellweger syndrome could be coupled with mitochondrial myopathy [30, 31]; Mitochondrial DNA depletion syndrome involves in deficiency in mitochondria (OMIM record: 251880, 609560).</b> |
| 1324        | 184         | Rheumatoid arthritis                    | Bare lymphocyte syndrome                           | 0.8683        | Rheumatoid arthritis has autoimmune features (OMIM record: 180300) and bare lymphocyte syndrome is classified as a immunological disease by Goh <i>et al.</i> [2].                          |
| 228         | 978         | Breast cancer                           | Melanoma                                           | 0.8682        | Both are in cancer class based on Goh <i>et al.</i> 's disease classification [2].                                                                                                          |
| <b>110</b>  | <b>1249</b> | <b>Anemia</b>                           | <b>Porphyria</b>                                   | <b>0.8679</b> | <b>Deficiency in heme biosynthesis could cause both porphyrias and for X-linked sideroblastic anemia [32].</b>                                                                              |
| <b>681</b>  | <b>224</b>  | <b>Hirschsprung disease</b>             | <b>Brachydactyly</b>                               | <b>0.8675</b> | <b>Both are involved in deficiency in development [3, 18].</b>                                                                                                                              |
| <b>287</b>  | <b>224</b>  | <b>Central hypoventilation syndrome</b> | <b>Brachydactyly</b>                               | <b>0.8673</b> | <b>Both are involved in deficiency in development [3] .</b>                                                                                                                                 |
| <b>689</b>  | <b>166</b>  | <b>Holoprosencephaly</b>                | <b>Atrial fibrillation or Atrial septal defect</b> | <b>0.8673</b> | <b>Not available.</b>                                                                                                                                                                       |
| 1040        | 1059        | Muscular dystrophy                      | Myopathy                                           | 0.8663        | Both are in muscular class based on Goh <i>et al.</i> 's disease classification [2].                                                                                                        |
| <b>1054</b> | <b>103</b>  | <b>Myocardial infarction</b>            | <b>Amyloidosis</b>                                 | <b>0.8659</b> | <b>Approximately 40% of patients with primary amyloidosis have had cardiac amyloidosis [33]. Patients with cardiac amyloidosis have the risk of fatal myocardial infarction [33].</b>       |
| <b>1272</b> | <b>1170</b> | <b>Prostate cancer</b>                  | <b>Ovarian cancer or carcinoma</b>                 | <b>0.8655</b> | <b>Both are in cancer class based on Goh <i>et al.</i>'s disease classification [2].</b>                                                                                                    |

|             |             |                                                              |                                             |               |                                                                                                                                                                                                                                           |
|-------------|-------------|--------------------------------------------------------------|---------------------------------------------|---------------|-------------------------------------------------------------------------------------------------------------------------------------------------------------------------------------------------------------------------------------------|
| 346         | 1178        | Colon cancer                                                 | Pancreatic cancer or carcinoma              | 0.8650        | Both are in cancer class based on Goh <i>et al.</i> 's disease classification [2].                                                                                                                                                        |
| <b>1383</b> | <b>164</b>  | <b>Severe combined immunodeficiency</b>                      | <b>Atopy</b>                                | <b>0.8646</b> | <b>Both are in immunological class based on Goh <i>et al.</i>'s disease classification [2].</b>                                                                                                                                           |
| <b>1043</b> | <b>9038</b> | <b>Mycobacterial infection or mycobacterium tuberculosis</b> | <b>Multiple sclerosis</b>                   | <b>0.8645</b> | <b>Multiple sclerosis is an autoimmune disease that affects the central nervous system [17]. Mycobacterial infection or mycobacterium tuberculosis is in immunological class based on Goh <i>et al.</i>'s disease classification [2].</b> |
| 228         | 668         | Breast cancer                                                | Hepatocellular carcinoma                    | 0.8640        | Both are in cancer class based on Goh <i>et al.</i> 's disease classification [2].                                                                                                                                                        |
| <b>877</b>  | <b>1615</b> | <b>Leigh syndrome</b>                                        | <b>Zellweger syndrome</b>                   | <b>0.8640</b> | <b>Zellweger syndrome could have coupled Mitochondrial myopathy [30, 31]; Leigh syndrome is involved in deficiency in mitochondria (OMIM record: 256000).</b>                                                                             |
| <b>873</b>  | <b>1110</b> | <b>Leber congenital amaurosis</b>                            | <b>Night blindness</b>                      | <b>0.8631</b> | <b>Both are in ophthalmological class based on Goh <i>et al.</i>'s disease classification [2].</b>                                                                                                                                        |
| <b>1126</b> | <b>1020</b> | <b>Obesity</b>                                               | <b>Maturity onset diabetes of the young</b> | <b>0.8622</b> | <b>Increases in body fat alter the body's response to insulin and lead to insulin resistance [34]. Maturity onset diabetes of the young involves in the defect in insulin production or response [10].</b>                                |
| 346         | 978         | Colon cancer                                                 | Melanoma                                    | 0.8612        | Both are in cancer class based on Goh <i>et al.</i> 's disease classification [2].                                                                                                                                                        |
| <b>1272</b> | <b>668</b>  | <b>Prostate cancer</b>                                       | <b>Hepatocellular carcinoma</b>             | <b>0.8607</b> | <b>Both are in cancer class based on Goh <i>et al.</i>'s disease classification [2].</b>                                                                                                                                                  |
| 937         | 240         | Macular degeneration                                         | Complement system deficiency                | 0.8607        | Complement C3 variant and complement factor H polymorphisms have been associated with age-related macular degeneration [35, 36].                                                                                                          |

|            |             |                                                  |                                             |               |                                                                                                                                                       |
|------------|-------------|--------------------------------------------------|---------------------------------------------|---------------|-------------------------------------------------------------------------------------------------------------------------------------------------------|
| 1054       | 1497        | Myocardial infarction                            | Thrombophilia                               | 0.8602        | Thrombophilia may contribute to the development of myocardial infarction in some young patients [37].                                                 |
| 668        | 1178        | Hepatocellular carcinoma                         | Pancreatic cancer or carcinoma              | 0.8596        | Both are in cancer class based on Goh <i>et al.</i> 's disease classification [2].                                                                    |
| <b>365</b> | <b>1054</b> | <b>Coronary artery or coronary heart disease</b> | <b>Myocardial infarction</b>                | <b>0.8594</b> | <b>Both are in cardiovascular class based on Goh <i>et al.</i>'s disease classification [2].</b>                                                      |
| <b>98</b>  | <b>724</b>  | <b>Alzheimer disease</b>                         | <b>Hypercholesterolemia</b>                 | <b>0.8594</b> | <b>High cholesterol may play important roles in the development of Alzheimer's disease [19, 38, 39].</b>                                              |
| 1272       | 523         | Prostate cancer                                  | Fanconi anemia                              | 0.8592        | Fanconi anemia has strong predisposition to cancer [2].                                                                                               |
| 1272       | 1503        | Prostate cancer                                  | Thyroid adenoma or carcinoma                | 0.8589        | Both are in cancer class based on Goh <i>et al.</i> 's disease classification [2].                                                                    |
| 268        | 166         | Cardiomyopathy                                   | Atrial fibrillation or Atrial septal defect | 0.8589        | Both are in cardiovascular class based on Goh <i>et al.</i> 's disease classification [2].                                                            |
| 98         | 412         | Alzheimer disease                                | Dementia                                    | 0.8559        | Both are in neurological class based on Goh <i>et al.</i> 's disease classification [2].                                                              |
| 1316       | 1110        | Retinitis pigmentosa                             | Night blindness                             | 0.8545        | Both are in ophthalmological class based on Goh <i>et al.</i> 's disease classification [2].                                                          |
| <b>296</b> | <b>589</b>  | <b>Ceroid-lipofuscinosis</b>                     | <b>Glaucoma</b>                             | <b>0.8535</b> | <b>Both are involved in abnormalities in lysosomal function [20, 40].</b>                                                                             |
| 346        | 572         | Colon cancer                                     | Gastric cancer                              | 0.8533        | Both are in cancer class based on Goh <i>et al.</i> 's disease classification [2].                                                                    |
| <b>228</b> | <b>1608</b> | <b>Breast cancer</b>                             | <b>Xeroderma pigmentosum</b>                | <b>0.8525</b> | <b>Xeroderma pigmentosum leads to skin cancer [7].</b>                                                                                                |
| <b>877</b> | <b>1218</b> | <b>Leigh syndrome</b>                            | <b>Pheochromocytoma</b>                     | <b>0.8518</b> | <b>Leigh syndrome is a mitochondrial disease (OMIM record: 256000). Mitochondrial deficiency might also play a role in Pheochromocytoma [41, 42].</b> |



|      |      |                                     |                                         |        |                                                                                                 |
|------|------|-------------------------------------|-----------------------------------------|--------|-------------------------------------------------------------------------------------------------|
| 1471 | 1383 | <b>Systemic lupus erythematosus</b> | <b>Severe combined immunodeficiency</b> | 0.8515 | <b>Both are in immunological class based on Goh <i>et al.</i>'s disease classification [2].</b> |
| 523  | 1170 | Fanconi anemia                      | Ovarian cancer or carcinoma             | 0.8510 | Fanconi anemia has strong predisposition to cancer [2].                                         |
| 1042 | 187  | <b>Myasthenic syndrome</b>          | <b>Bartter syndrome</b>                 | 0.8506 | <b>Both are involved in ion-transport deficiency [6, 43, 44].</b>                               |
| 346  | 228  | Colon cancer                        | Breast cancer                           | 0.8505 | Both are in cancer class based on Goh <i>et al.</i> 's disease classification [2].              |

**Note:** in the column of “Supporting evidence for association”, evidence based on the descriptions of OMIM records is listed with corresponding OMIM record IDs.

## References:

1. Steinberg SJ, Dodt G, Raymond GV, Braverman NE, Moser AB, Moser HW: **Peroxisome biogenesis disorders**. *Biochim Biophys Acta* 2006, **1763**(12):1733-1748.
2. Goh KI, Cusick ME, Valle D, Childs B, Vidal M, Barabasi AL: **The human disease network**. *Proc Natl Acad Sci U S A* 2007, **104**(21):8685-8690.
3. Oti M, Brunner HG: **The modular nature of genetic diseases**. *Clin Genet* 2007, **71**(1):1-11.
4. Mayan H, Vered I, Mouallem M, Tzadok-Witkon M, Pauzner R, Farfel Z: **Pseudohypoaldosteronism type II: marked sensitivity to thiazides, hypercalciuria, normomagnesemia, and low bone mineral density**. *J Clin Endocrinol Metab* 2002, **87**(7):3248-3254.
5. Pradervand S, Barker PM, Wang Q, Ernst SA, Beermann F, Grubb BR, Burnier M, Schmidt A, Bindels RJ, Gatzky JT *et al*: **Salt restriction induces pseudohypoaldosteronism type 1 in mice expressing low levels of the beta-subunit of the amiloride-sensitive epithelial sodium channel**. *Proc Natl Acad Sci U S A* 1999, **96**(4):1732-1737.

6. Koren W, Peleg E, Rosenthal T, Postnov YV: **Membrane ion transport in Bartter's syndrome: evidence for a new syndrome subtype.** *Hypertension* 1997, **30**(6):1338-1341.
7. Chen LIQWDJ: **DNA REPAIR, GENETIC INSTABILITY, AND CANCER:** World Scientific Publishing; 2007.
8. Atlas DH, Gaberman P, Stern K: **Primary amyloidosis associated with hyperlipemia and hypercholesterolemia; report of case.** *Am J Clin Pathol* 1950, **20**(4):371-376.
9. Rother KI: **Diabetes treatment--bridging the divide.** *N Engl J Med* 2007, **356**(15):1499-1501.
10. Fajans SS, Bell GI, Polonsky KS: **Molecular mechanisms and clinical pathophysiology of maturity-onset diabetes of the young.** *N Engl J Med* 2001, **345**(13):971-980.
11. Pierangeli SS, Girardi G, Vega-Ostertag M, Liu X, Espinola RG, Salmon J: **Requirement of activation of complement C3 and C5 for antiphospholipid antibody-mediated thrombophilia.** *Arthritis Rheum* 2005, **52**(7):2120-2124.
12. Pierangeli SS, Vega-Ostertag M, Liu X, Girardi G: **Complement activation: a novel pathogenic mechanism in the antiphospholipid syndrome.** *Ann N Y Acad Sci* 2005, **1051**:413-420.
13. Khan S, Dickerman JD: **Hereditary thrombophilia.** *Thromb J* 2006, **4**:15.
14. McNally EM: **New approaches in the therapy of cardiomyopathy in muscular dystrophy.** *Annu Rev Med* 2007, **58**:75-88.
15. Markiewski MM, Nilsson B, Ekdahl KN, Mollnes TE, Lambris JD: **Complement and coagulation: strangers or partners in crime?** *Trends Immunol* 2007, **28**(4):184-192.
16. Esmon CT: **Interactions between the innate immune and blood coagulation systems.** *Trends Immunol* 2004, **25**(10):536-542.
17. Goetz CG: **Textbook of Clinical Neurology**, 2 edn. Philadelphia: Saunders; 2003.
18. Temtamy SA, Aglan MS: **Brachydactyly.** *Orphanet J Rare Dis* 2008, **3**:15.
19. Hooijmans CR, Kiliaan AJ: **Fatty acids, lipid metabolism and Alzheimer pathology.** *Eur J Pharmacol* 2008, **585**(1):176-196.
20. Sedel F, Turpin JC, Baumann N: **[Neurological presentations of lysosomal diseases in adult patients].** *Rev Neurol (Paris)* 2007, **163**(10):919-929.
21. Zangari M, Elice F, Fink L, Tricot G: **Hemostatic dysfunction in paraproteinemias and amyloidosis.** *Semin Thromb Hemost* 2007, **33**(4):339-349.
22. Vohra J: **The Long QT Syndrome.** *Heart Lung Circ* 2007, **16 Suppl 3**:S5-12.
23. Caligiuri G, Levy B, Pernow J, Thoren P, Hansson GK: **Myocardial infarction mediated by endothelin receptor signaling in hypercholesterolemic mice.** *Proc Natl Acad Sci U S A* 1999, **96**(12):6920-6924.
24. Lai D, Schroer B: **Haddad syndrome: a case of an infant with central congenital hypoventilation syndrome and Hirschsprung disease.** *J Child Neurol* 2008, **23**(3):341-343.

25. Mahmoud M, Bryan Y, Gunter J, Kreeger RN, Sadhasivam S: **Anesthetic implications of undiagnosed late onset central hypoventilation syndrome in a child: from elective tonsillectomy to tracheostomy.** *Paediatr Anaesth* 2007, **17**(10):1001-1005.
26. Anderson KE, Bloomer JR, Bonkovsky HL, Kushner JP, Pierach CA, Pimstone NR, Desnick RJ: **Recommendations for the diagnosis and treatment of the acute porphyrias.** *Ann Intern Med* 2005, **142**(6):439-450.
27. Yasuda M, Kawarabayashi T, Akioka K, Teragaki M, Oku H, Kanayama Y, Takeuchi K, Takeda T, Kawase Y, Ikuno Y: **The complement system in the acute phase of myocardial infarction.** *Jpn Circ J* 1989, **53**(9):1017-1022.
28. Dobyns WB, Pagon RA, Armstrong D, Curry CJ, Greenberg F, Grix A, Holmes LB, Laxova R, Michels VV, Robinow M *et al*: **Diagnostic criteria for Walker-Warburg syndrome.** *Am J Med Genet* 1989, **32**(2):195-210.
29. Hafer-Macko CE, Dyck PJ, Koski CL: **Complement activation in acquired and hereditary amyloid neuropathy.** *J Peripher Nerv Syst* 2000, **5**(3):131-139.
30. Sarnat HB, Machin G, Darwish HZ, Rubin SZ: **Mitochondrial myopathy of cerebro-hepato-renal (Zellweger) syndrome.** *Can J Neurol Sci* 1983, **10**(3):170-177.
31. Muller-Hocker J, Walther JU, Bise K, Pongratz D, Hubner G: **Mitochondrial myopathy with loosely coupled oxidative phosphorylation in a case of Zellweger syndrome. A cytochemical-ultrastructural study.** *Virchows Arch B Cell Pathol Incl Mol Pathol* 1984, **45**(2):125-138.
32. Ajioka RS, Phillips JD, Kushner JP: **Biosynthesis of heme in mammals.** *Biochim Biophys Acta* 2006, **1763**(7):723-736.
33. Kotani N, Hashimoto H, Muraoka M, Kabara S, Okawa H, Matsuki A: **Fatal perioperative myocardial infarction in four patients with cardiac amyloidosis.** *Anesthesiology* 2000, **92**(3):873-875.
34. Keller U: **From obesity to diabetes.** *Int J Vitam Nutr Res* 2006, **76**(4):172-177.
35. Thakkinstian A, Han P, McEvoy M, Smith W, Hoh J, Magnusson K, Zhang K, Attia J: **Systematic review and meta-analysis of the association between complement factor H Y402H polymorphisms and age-related macular degeneration.** *Hum Mol Genet* 2006, **15**(18):2784-2790.
36. Yates JR, Sepp T, Matharu BK, Khan JC, Thurlby DA, Shahid H, Clayton DG, Hayward C, Morgan J, Wright AF *et al*: **Complement C3 variant and the risk of age-related macular degeneration.** *N Engl J Med* 2007, **357**(6):553-561.
37. Segev A, Ellis MH, Segev F, Friedman Z, Reshef T, Sparkes JD, Tetro J, Pauzner H, David D: **High prevalence of thrombophilia among young patients with myocardial infarction and few conventional risk factors.** *Int J Cardiol* 2005, **98**(3):421-424.
38. Anstey KJ, Lipnicki DM, Low LF: **Cholesterol as a risk factor for dementia and cognitive decline: a systematic review of prospective studies with meta-analysis.** *Am J Geriatr Psychiatry* 2008, **16**(5):343-354.

39. Xiong H, Callaghan D, Jones A, Walker DG, Lue LF, Beach TG, Sue LI, Woulfe J, Xu H, Stanimirovic DB *et al*: **Cholesterol retention in Alzheimer's brain is responsible for high beta- and gamma-secretase activities and Abeta production.** *Neurobiol Dis* 2008, **29**(3):422-437.
40. Hayasaka S: **Lysosomal enzymes in ocular tissues and diseases.** *Surv Ophthalmol* 1983, **27**(4):245-258.
41. Favier J, Briere JJ, Stropf L, Amar L, Filali M, Jeunemaitre X, Rustin P, Gimenez-Roqueplo AP: **Hereditary paraganglioma/pheochromocytoma and inherited succinate dehydrogenase deficiency.** *Horm Res* 2005, **63**(4):171-179.
42. Dahia PL, Ross KN, Wright ME, Hayashida CY, Santagata S, Barontini M, Kung AL, Sanso G, Powers JF, Tischler AS *et al*: **A HIF1alpha regulatory loop links hypoxia and mitochondrial signals in pheochromocytomas.** *PLoS Genet* 2005, **1**(1):72-80.
43. Croxen R, Hatton C, Shelley C, Brydson M, Chauplannaz G, Oosterhuis H, Vincent A, Newsom-Davis J, Colquhoun D, Beeson D: **Recessive inheritance and variable penetrance of slow-channel congenital myasthenic syndromes.** *Neurology* 2002, **59**(2):162-168.
44. Tsujino A, Maertens C, Ohno K, Shen XM, Fukuda T, Harper CM, Cannon SC, Engel AG: **Myasthenic syndrome caused by mutation of the SCN4A sodium channel.** *Proc Natl Acad Sci U S A* 2003, **100**(12):7377-7382.
