# Supplementary material for: Genome-wide prioritization of disease genes and identification of disease-disease associations from an integrated human functional linkage network
Source: PubMed Central journal article supplement (PMC2768980; doi:10.1186/gb-2009-10-9-r91), 2009-09-03
Supplement: gb-2009-10-9-r91-S10.pdf [file gb-2009-10-9-r91-S10.pdf]

**List of the disease clusters, their disease members, and evidence supporting the association for Figure 8A of the main manuscript and Figure S7 of Additional File 5.**

| Cluster name                                        | Disease names of members             | Disease ID of members | Supporting evidence                                                                           |
|-----------------------------------------------------|--------------------------------------|-----------------------|-----------------------------------------------------------------------------------------------|
| <b>Cancer</b>                                       | Thyroid adenoma or carcinoma         | 1503                  | in cancer class based on Goh <i>et al.</i> 's disease classification [1].                     |
|                                                     | Prostate cancer                      | 1272                  | in cancer class based on Goh <i>et al.</i> 's disease classification [1].                     |
|                                                     | Hepatocellular carcinoma             | 668                   | in cancer class based on Goh <i>et al.</i> 's disease classification [1].                     |
|                                                     | Gastric cancer                       | 572                   | in cancer class based on Goh <i>et al.</i> 's disease classification [1].                     |
|                                                     | Pancreatic cancer or carcinoma       | 1178                  | in cancer class based on Goh <i>et al.</i> 's disease classification [1].                     |
|                                                     | Ovarian cancer or carcinoma          | 1170                  | in cancer class based on Goh <i>et al.</i> 's disease classification [1].                     |
|                                                     | Colon cancer                         | 346                   | in cancer class based on Goh <i>et al.</i> 's disease classification [1].                     |
|                                                     | Melanoma                             | 978                   | in cancer class based on Goh <i>et al.</i> 's disease classification [1].                     |
|                                                     | Breast cancer                        | 228                   | in cancer class based on Goh <i>et al.</i> 's disease classification [1].                     |
|                                                     | Fanconi anemia                       | 523                   | Fanconi anemia has strong predisposition to cancer [1].                                       |
|                                                     | Xeroderma pigmentosum                | 1608                  | Xeroderma pigmentosum leads to skin cancer [2].                                               |
| <b>Deficiency in insulin production or response</b> | Diabetes mellitus                    | 427                   | involved in diminished production of insulin or diminished response to insulin [3, 4].        |
|                                                     | Maturity onset diabetes of the young | 1020                  | involved in diminished production of insulin or diminished response to insulin [3, 4].        |
|                                                     | Obesity                              | 1126                  | Increases in body fat alter the body's response to insulin leading to insulin resistance [5]. |

| Cluster name                            | Disease names of members                                | Disease ID of members | Supporting evidence                                                                      |
|-----------------------------------------|---------------------------------------------------------|-----------------------|------------------------------------------------------------------------------------------|
| <b>Immunological diseases</b>           | Atopy                                                   | 164                   | in immunological class based on Goh <i>et al.</i> 's disease classification [1]          |
|                                         | Severe combined immunodeficiency                        | 1383                  | in immunological class based on Goh <i>et al.</i> 's disease classification [1]          |
|                                         | Systemic lupus erythematosus                            | 1471                  | in immunological class based on Goh <i>et al.</i> 's disease classification [1]          |
|                                         | Multiple sclerosis                                      | 9038                  | Multiple sclerosis is an autoimmune disease that affects the central nervous system [6]. |
|                                         | Malaria                                                 | 940                   | in immunological class based on Goh <i>et al.</i> 's disease classification [1]          |
|                                         | Mycobacterial infection or mycobacterium tuberculosis   | 1043                  | in immunological class based on Goh <i>et al.</i> 's disease classification [1]          |
|                                         | Immunodeficiency due to defect in CD3 or with hyper-IgM | 802                   | in immunological class based on Goh <i>et al.</i> 's disease classification [1]          |
|                                         | Rheumatoid arthritis                                    | 1324                  | Rheumatoid arthritis has autoimmune features (OMIM record: 180300).                      |
|                                         | Bare lymphocyte syndrome                                | 184                   | in immunological class based on Goh <i>et al.</i> 's disease classification [1]          |
| <b>Deficiency in lysosomal function</b> | Mucopolysaccharidosis                                   | 1033                  | involved in abnormalities of lysosomal function [7].                                     |
|                                         | Ceroid-lipofuscinosis                                   | 296                   | involved in abnormalities of lysosomal function [7].                                     |
|                                         | Glaucoma                                                | 589                   | involved in abnormalities in lysosomal function [7, 8].                                  |
| <b>Peroxisome biogenesis disorders</b>  | Zellweger syndrome                                      | 1615                  | peroxisome biogenesis disorder [9]                                                       |
|                                         | Refsum disease                                          | 1307                  | peroxisome biogenesis disorder [9]                                                       |
|                                         | Adrenoleukodystrophy                                    | 56                    | peroxisome biogenesis disorder [9]                                                       |

| Cluster name                       | Disease names of members                      | Disease ID of members | Supporting evidence                                                                |
|------------------------------------|-----------------------------------------------|-----------------------|------------------------------------------------------------------------------------|
| <b>Deficiency in development</b>   | Waardenburg syndrome                          | 1574                  | Involved in deficiency in developmental process [10].                              |
|                                    | Central hypoventilation syndrome              | 287                   | Involved in deficiency in developmental process [10].                              |
|                                    | Holoprosencephaly                             | 689                   | Involved in deficiency in development (OMIM record: 236100).                       |
|                                    | Hirschsprung disease                          | 681                   | Involved in deficiency in developmental process [10].                              |
|                                    | Brachydactyly                                 | 224                   | Involved in deficiency in development [11]                                         |
| <b>Deficiency in mitochondria</b>  | Leigh syndrome                                | 877                   | Deficiency in mitochondria (OMIM record: 256000)                                   |
|                                    | Combined oxidative phosphorylation deficiency | 6350                  | Deficiency in mitochondria (OMIM record: 609060, 610498, 610678, 611719, 610505 ). |
|                                    | Mitochondrial DNA depletion syndrome          | 5016                  | Deficiency in mitochondria (OMIM record: 251880, 609560).                          |
|                                    | Mitochondrial complex I/II/III deficiency     | 1016                  | Deficiency in mitochondria (OMIM record: 252010, 124000, 252011)                   |
| <b>Deficiency in ion transport</b> | Long QT syndrome                              | 912                   | Involved in ion-transport deficiency [12, 13].                                     |
|                                    | Bartter syndrome                              | 187                   | Involved in ion-transport deficiency [12, 13].                                     |
|                                    | Pseudohypoaldosteronism                       | 1281                  | Involved in ion-transport deficiency [13-15].                                      |
|                                    | Myasthenic syndrome                           | 1042                  | Involved in ion-transport deficiency [13, 16, 17].                                 |

| Cluster name                               | Disease names of members                    | Disease ID of members | Supporting evidence                                                                                                                                                                                                                                                                                 |
|--------------------------------------------|---------------------------------------------|-----------------------|-----------------------------------------------------------------------------------------------------------------------------------------------------------------------------------------------------------------------------------------------------------------------------------------------------|
| <b>Cardiovascular or muscular diseases</b> | Cardiomyopathy                              | 268                   | In cardiovascular class based on Goh <i>et al.</i> 's disease classification [1].                                                                                                                                                                                                                   |
|                                            | Atrial fibrillation or Atrial septal defect | 166                   | In cardiovascular class based on Goh <i>et al.</i> 's disease classification [1].                                                                                                                                                                                                                   |
|                                            | Long QT syndrome                            | 912                   | In cardiovascular class based on Goh <i>et al.</i> 's disease classification [1].                                                                                                                                                                                                                   |
|                                            | Muscular dystrophy                          | 1040                  | Muscular dystrophy in muscular class based on Goh <i>et al.</i> 's disease classification [1]. Some diseases in cardiovascular class such as "long QT syndrome " [18-20] and cardiomyopathy involve in muscle contraction deficiency (OMIM record: 115200, 500000, 192600, 601154, 600884, 600858). |
|                                            | Myopathy                                    | 1059                  | Myopathy is in muscular class based on Goh <i>et al.</i> 's disease classification [1]. Some diseases in cardiovascular class such as "long QT syndrome " [18-20] and cardiomyopathy involve in muscle contraction deficiency (OMIM record: 115200, 500000, 192600, 601154, 600884, 600858).        |
| <b>Ophthalmological diseases</b>           | Night blindness                             | 1110                  | In ophthalmological class based on Goh <i>et al.</i> 's disease classification [1].                                                                                                                                                                                                                 |
|                                            | Leber congenital amaurosis                  | 873                   | In ophthalmological class based on Goh <i>et al.</i> 's disease classification [1].                                                                                                                                                                                                                 |
|                                            | Retinitis pigmentosa                        | 1316                  | In ophthalmological class based on Goh <i>et al.</i> 's disease classification [1].                                                                                                                                                                                                                 |
|                                            | Cone or cone-rod dystrophy                  | 352                   | In ophthalmological class based on Goh <i>et al.</i> 's disease classification [1].                                                                                                                                                                                                                 |

## References:

1. Goh KI, Cusick ME, Valle D, Childs B, Vidal M, Barabasi AL: **The human disease network**. *Proc Natl Acad Sci U S A* 2007, **104**(21):8685-8690.
2. Chen LIQWDJ: **DNA REPAIR, GENETIC INSTABILITY, AND CANCER**: World Scientific Publishing; 2007.
3. Rother KI: **Diabetes treatment--bridging the divide**. *N Engl J Med* 2007, **356**(15):1499-1501.
4. Fajans SS, Bell GI, Polonsky KS: **Molecular mechanisms and clinical pathophysiology of maturity-onset diabetes of the young**. *N Engl J Med* 2001, **345**(13):971-980.
5. Keller U: **From obesity to diabetes**. *Int J Vitam Nutr Res* 2006, **76**(4):172-177.
6. Goetz CG: **Textbook of Clinical Neurology**, 2 edn. Philadelphia: Saunders; 2003.
7. Sedel F, Turpin JC, Baumann N: **[Neurological presentations of lysosomal diseases in adult patients]**. *Rev Neurol (Paris)* 2007, **163**(10):919-929.
8. Hayasaka S: **Lysosomal enzymes in ocular tissues and diseases**. *Surv Ophthalmol* 1983, **27**(4):245-258.
9. Steinberg SJ, Dodt G, Raymond GV, Braverman NE, Moser AB, Moser HW: **Peroxisome biogenesis disorders**. *Biochim Biophys Acta* 2006, **1763**(12):1733-1748.
10. Oti M, Brunner HG: **The modular nature of genetic diseases**. *Clin Genet* 2007, **71**(1):1-11.
11. Temtamy SA, Aglan MS: **Brachydactyly**. *Orphanet J Rare Dis* 2008, **3**:15.
12. Vohra J: **The Long QT Syndrome**. *Heart Lung Circ* 2007, **16 Suppl 3**:S5-12.
13. Koren W, Peleg E, Rosenthal T, Postnov YV: **Membrane ion transport in Bartter's syndrome: evidence for a new syndrome subtype**. *Hypertension* 1997, **30**(6):1338-1341.
14. Mayan H, Vered I, Mouallem M, Tzadok-Witkon M, Pauzner R, Farfel Z: **Pseudohypoaldosteronism type II: marked sensitivity to thiazides, hypercalciuria, normomagnesemia, and low bone mineral density**. *J Clin Endocrinol Metab* 2002, **87**(7):3248-3254.
15. Pradervand S, Barker PM, Wang Q, Ernst SA, Beermann F, Grubb BR, Burnier M, Schmidt A, Bindels RJ, Gatzky JT *et al.*: **Salt restriction induces pseudohypoaldosteronism type 1 in mice expressing low levels of the beta-subunit of the amiloride-sensitive epithelial sodium channel**. *Proc Natl Acad Sci U S A* 1999, **96**(4):1732-1737.

16. Croxen R, Hatton C, Shelley C, Brydson M, Chauplannaz G, Oosterhuis H, Vincent A, Newsom-Davis J, Colquhoun D, Beeson D: **Recessive inheritance and variable penetrance of slow-channel congenital myasthenic syndromes.** *Neurology* 2002, **59**(2):162-168.
17. Tsujino A, Maertens C, Ohno K, Shen XM, Fukuda T, Harper CM, Cannon SC, Engel AG: **Myasthenic syndrome caused by mutation of the SCN4A sodium channel.** *Proc Natl Acad Sci U S A* 2003, **100**(12):7377-7382.
18. Goldenberg I, Moss AJ: **Long QT syndrome.** *J Am Coll Cardiol* 2008, **51**(24):2291-2300.
19. Sauer AJ, Moss AJ, McNitt S, Peterson DR, Zareba W, Robinson JL, Qi M, Goldenberg I, Hobbs JB, Ackerman MJ *et al.*: **Long QT syndrome in adults.** *J Am Coll Cardiol* 2007, **49**(3):329-337.
20. Crotti L, Celano G, Dagradi F, Schwartz PJ: **Congenital long QT syndrome.** *Orphanet J Rare Dis* 2008, **3**:18.
